# Supplementary material
Source: MDPI journal article supplement (https://www.mdpi.com/2220-9964/6/6/167)
Supplement: s1 [file s1]

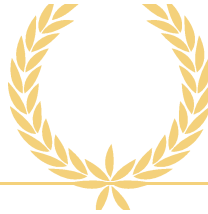

We certify that the following article

## Construction of decision support system based on GP service, using warning-judgment module as an example

Xuejia Sang, Linfu Xue \*, Xiaopeng Leng, Jiwen Liu, Liang Zhan

has undergone English language editing by MDPI. The text has been checked for correct use of grammar and common technical terms, and edited to a level suitable for reporting research in a scholarly journal.

MDPI uses experienced, native English speaking editors. Full details of the editing service can be found at

► [www.mdpi.com/authors/english](http://www.mdpi.com/authors/english).

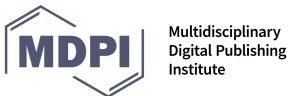

Basel, May 2017

Martyn Rittman, Ph.D.  
English Editing Manager
